# Supplementary material
Source: publisher figshare collection journal article supplement (https://tandf.figshare.com/ndownloader/files/36573830)
Supplement: Supplementary file 1 [file 36573830]

**Supplementary Material**

**Dyeing of silk through iron ion-induced formation of hydrophobic lignin coatings**

Ying Ma, Qinfu Lu, Shanshan Lv*

State Key Laboratory of Organic-Inorganic Composite Materials, Beijing University of Chemical Technology, Beijing 100029, China

*Corresponding author. E-mail address: lvshanshan@mail.buct.edu.cn (ORCID 0000-0002-6068-3048)

Author Contributions: L. S. conceived the idea, designed the experiments, analyzed the data, and wrote the manuscript. M. Y. conducted the potentiometric titration, UV/Vis, dyeing experiments and analyzed the water contact angles. L. Q. reproduced the dyeing experiments on silk fabrics and analyzed the water contact angles.


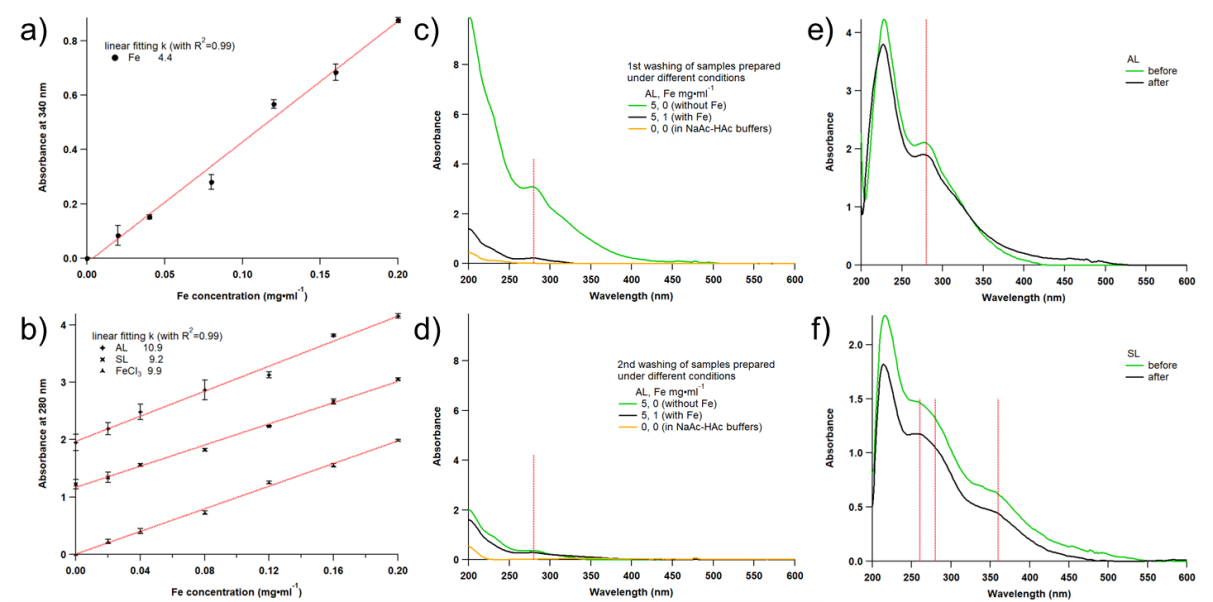


Fig. S1 UV spectroscopy analysis of the lignin samples. a) a standard curve of FeCl3 based on its absorbance at 340 nm; b) effect of the FeCl3 concentration on the intensity of absorbance at 280 nm; comparison of silk dyeing with or without Fe in the aspect of AL loss after washing for c) once and d) twice; absorbance intensity change of e) AL and f) SL before and after dyeing the silk fabric samples.


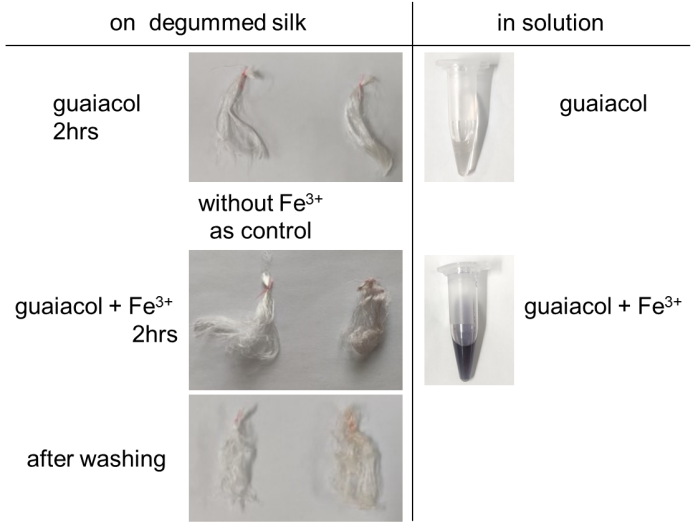


Fig. S2 Guaiacol was included as a model compound of lignin. Left: photographs of degummed silk fibers after two-step dyeing. Before washing the color was light purple, while after washing the color faded to pale yellow. Right: Addition of FeCl3 induced dramatic color change of a guaiacol solution.


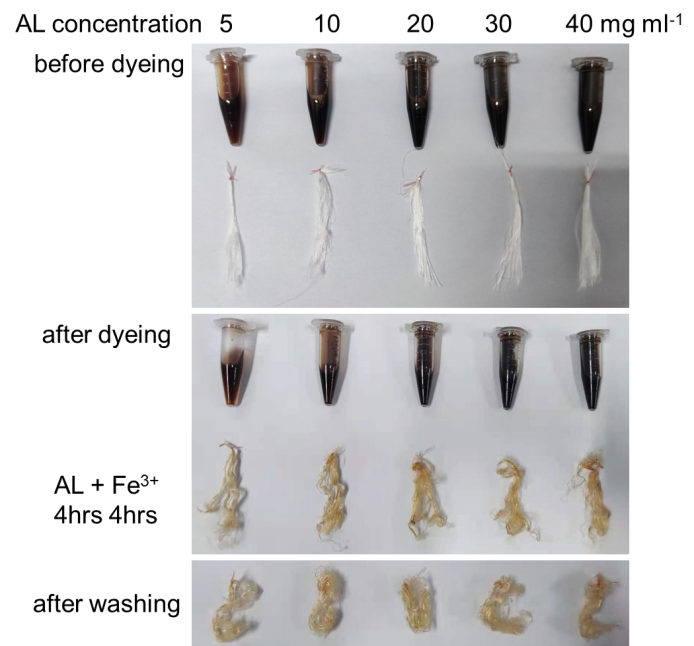


Fig.S3 Effect of the lignin concentration. Degummed silk fiber samples were first immersed in NaAc-HAc (200mM, pH=4.5) buffers with AL concentrations ranging from 5 to 40 mg·ml-1 for 4 hrs, then in 1 mg·ml-1 FeCl3 for 4 hrs, at a liquor ratio of 1:100 and at room temperature.


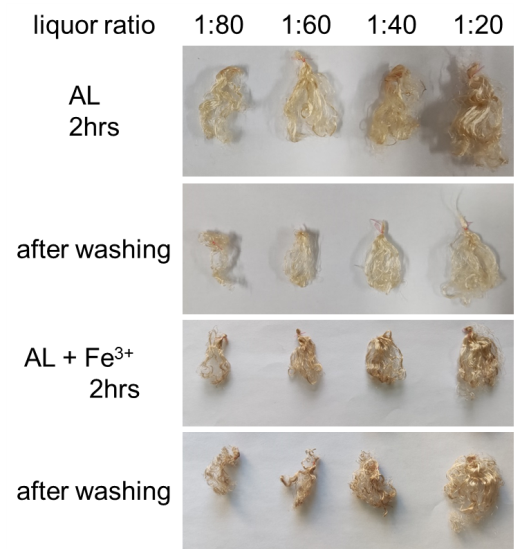


Fig.S4 Effect of the liquor ratio. Degummed silk fiber samples were first immersed in NaAc-HAc (200mM, pH=4.5) buffers with 5 mg·ml-1 AL, then in 1 mg·ml-1 FeCl3, at room temperature, at different liquor ratios.


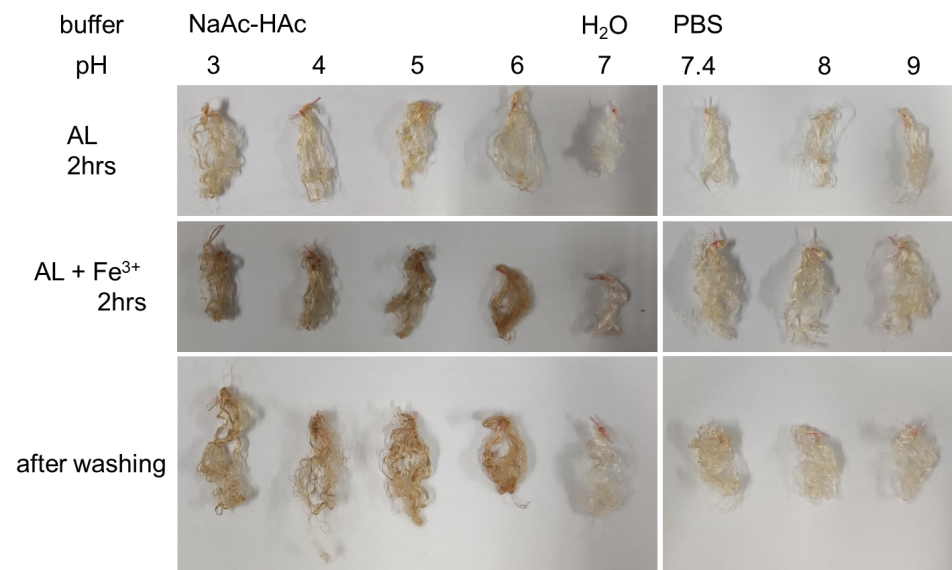


Fig.S5 Effect of pH. Degummed silk fiber samples were first immersed in different buffers with 5 mg·ml-1 AL, then in 1 mg·ml-1 FeCl3, at a liquor ratio of 1:100 and at room temperature.


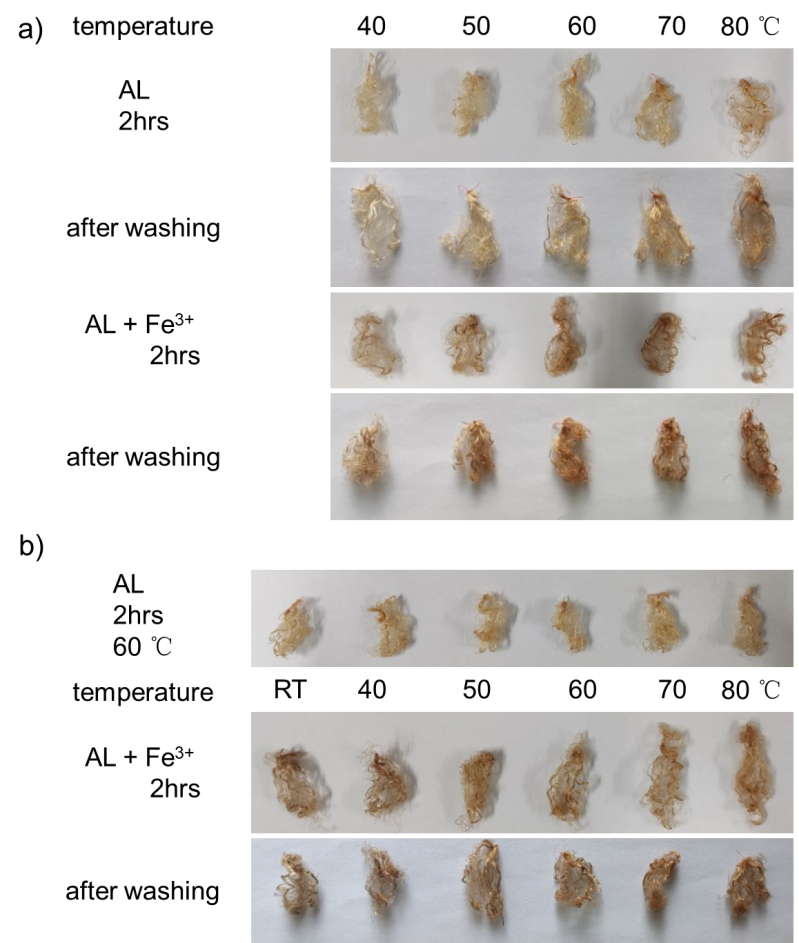


Fig.S6 Effect of temperature. Degummed silk fiber samples were first immersed in NaAc-HAc (200mM, pH=4.5) buffers with 5 mg·ml-1 AL, then in 1 mg·ml-1 FeCl3, at a liquor ratio of 1:100, at different temperatures.


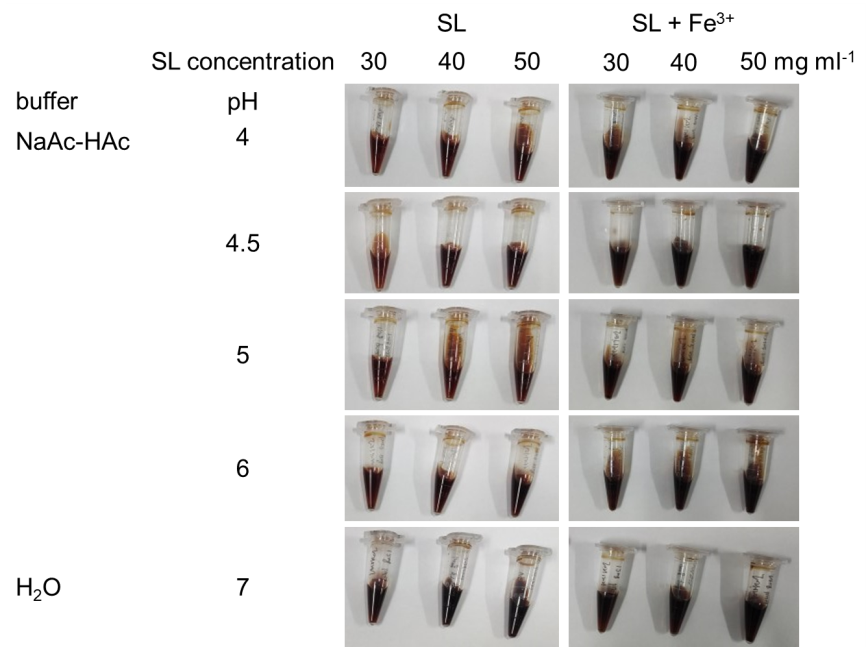


Fig. S7 Effect of concentration and pH on the Fe-SL interactions in solutions.


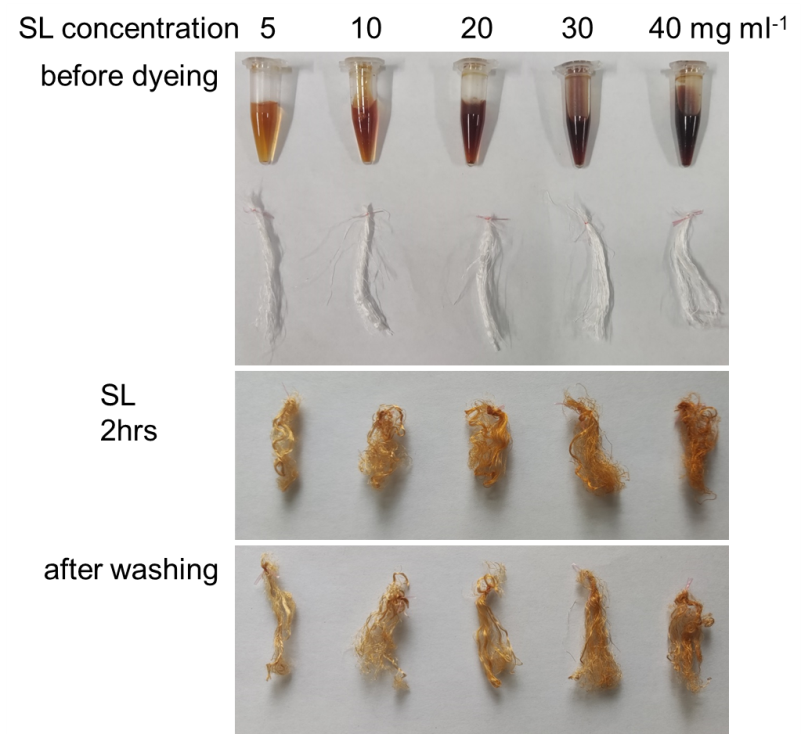


Fig. S8 Effect of the lignin concentration. Degummed silk fiber samples were first immersed in NaAc-HAc (200mM, pH=4.5) buffers with SL concentrations ranging from 5 to 40 mg·ml-1 for 2 hrs at a liquor ratio of 1:100 and at room temperature.


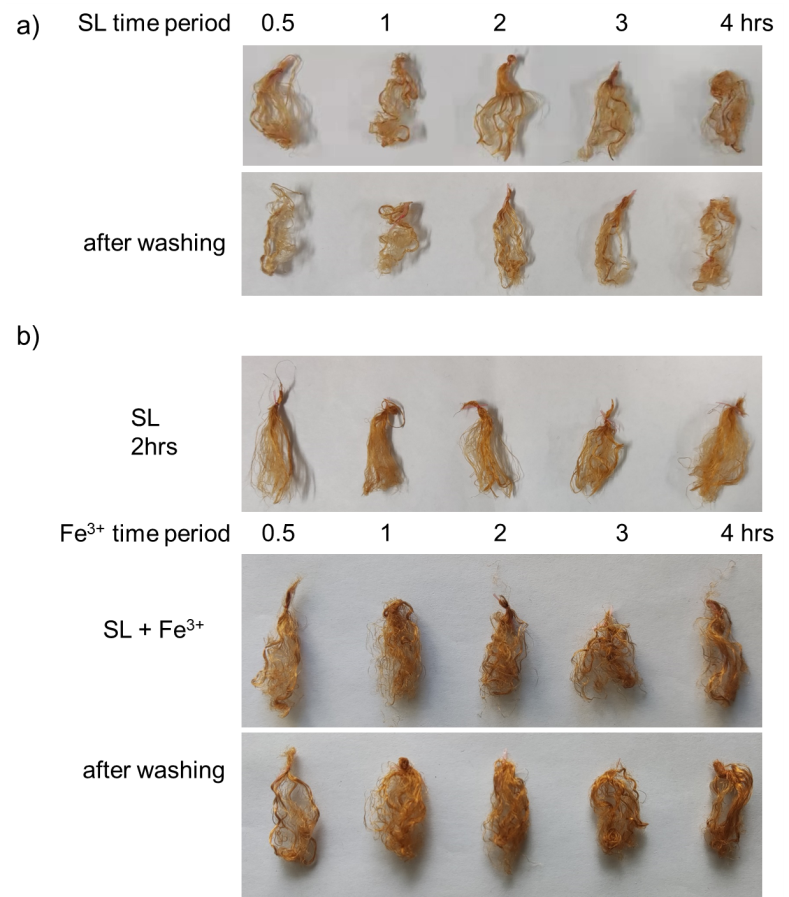


Fig. S9 Effect of the immersing time. Degummed silk fiber samples were first immersed in NaAc-HAc (200mM, pH=4.5) buffers with 40 mg·ml-1 SL, then in 1 mg·ml-1 FeCl3, for different time periods, at a liquor ratio of 1:100 and at room temperature.


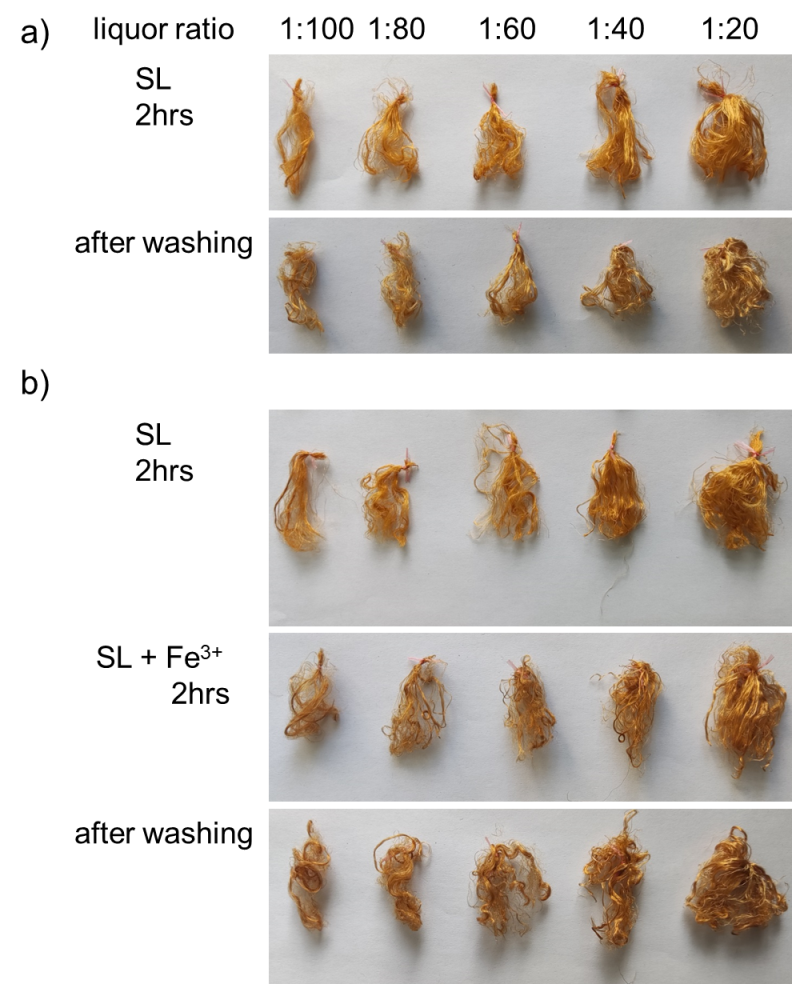


Fig. S10 Effect of the liquor ratio. Degummed silk fiber samples were first immersed in NaAc-HAc (200mM, pH=4.5) buffers with 40 mg·ml-1 SL, then in 1 mg·ml-1 FeCl3, at room temperature, at different liquor ratios.


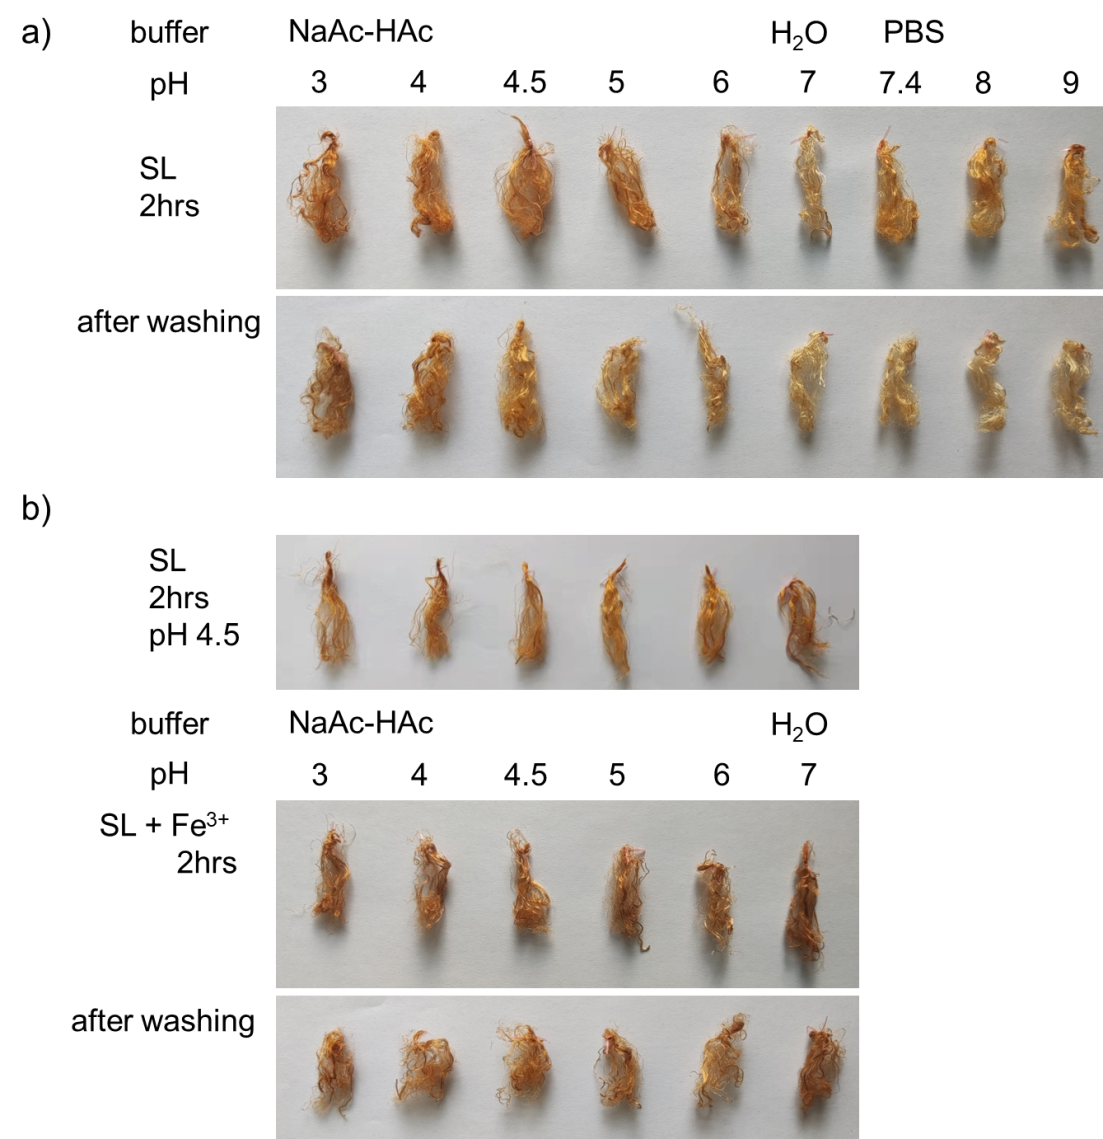


Fig. S11 Effect of pH on dyeing of silk by SL. Degummed silk fiber samples were first immersed in different buffers with 40 mg·ml-1 SL, then in aqueous solutions of 1 mg·ml-1 FeCl3, at a liquor ratio of 1:100 and at room temperature.


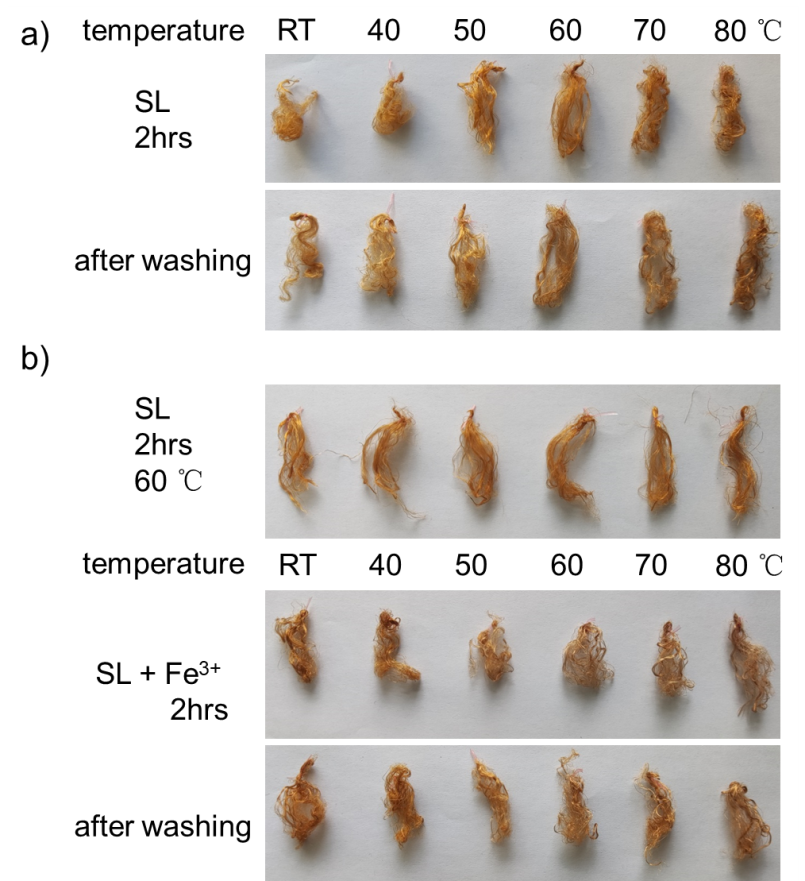


Fig. S12 Effect of temperature. Degummed silk fiber samples were first immersed in NaAc-HAc (200mM, pH=4.5) buffers with 40 mg·ml-1 SL, then in 1 mg·ml-1 FeCl3, at a liquor ratio of 1:100, at different temperatures.


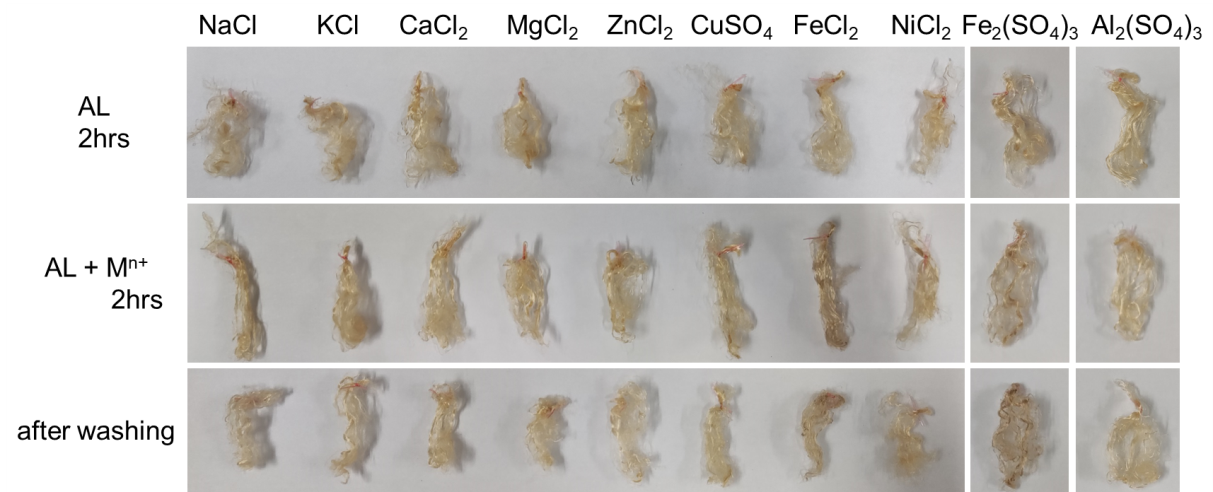


Fig. S13 Effect of metal ions. Degummed silk fiber samples were first immersed in NaAc-HAc (200mM, pH=4.5) buffers with 5 mg·ml-1 AL, then in 1 mg·ml-1 salts, at a liquor ratio of 1:100 and at room temperature.


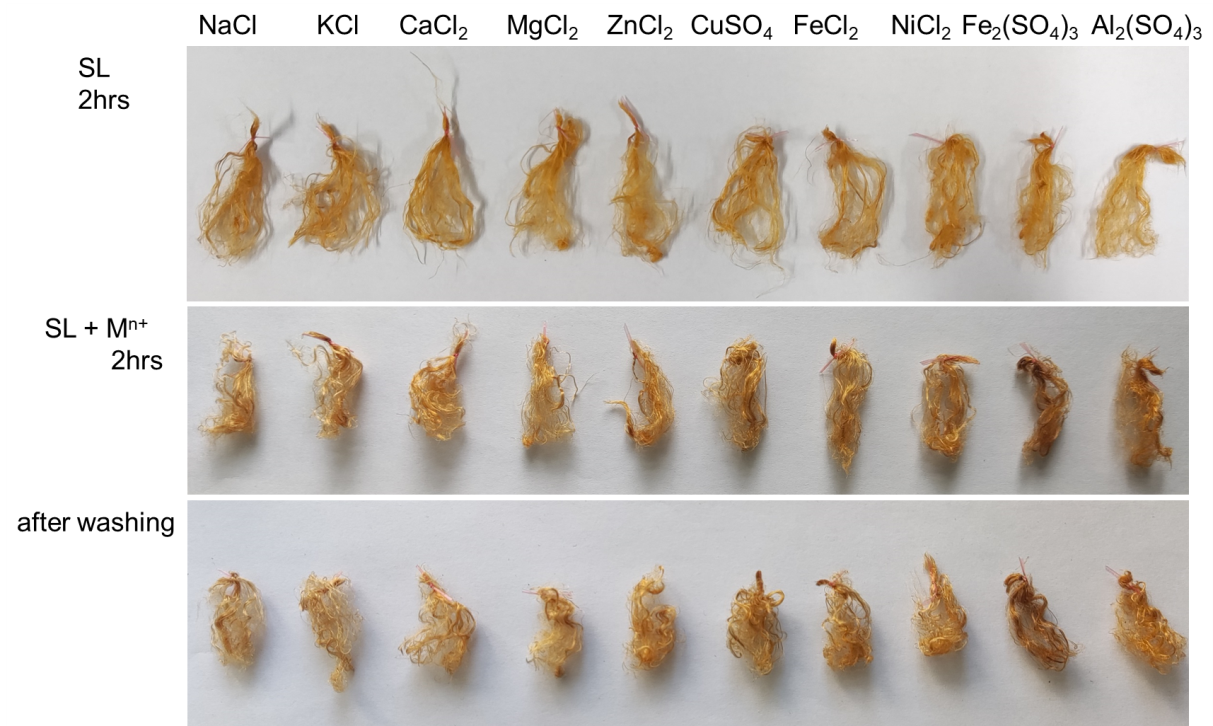


Fig. S14 Effect of metal ions. Degummed silk fiber samples were first immersed in NaAc-HAc (200mM, pH=4.5) buffers with 40 mg·ml-1 SL, then in 1 mg·ml-1 salts, at a liquor ratio of 1:100 and at room temperature.


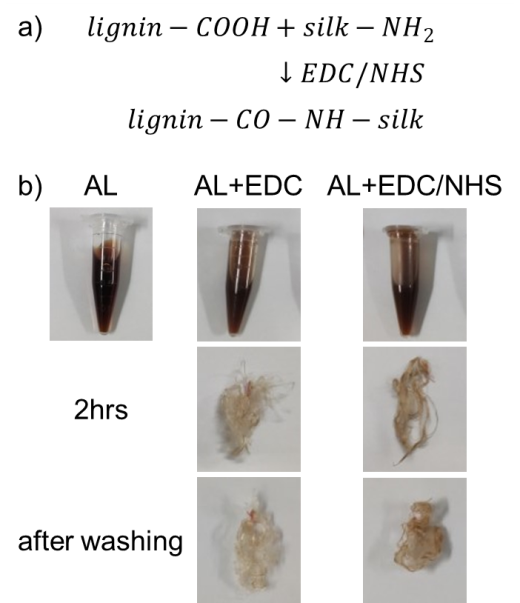


Fig. S15 Dyeing of silk by AL through alternative covalent crosslinking. AL was pretreated with EDC/NHS for 0.5 hr., and then used to dye the degummed silk fiber samples.


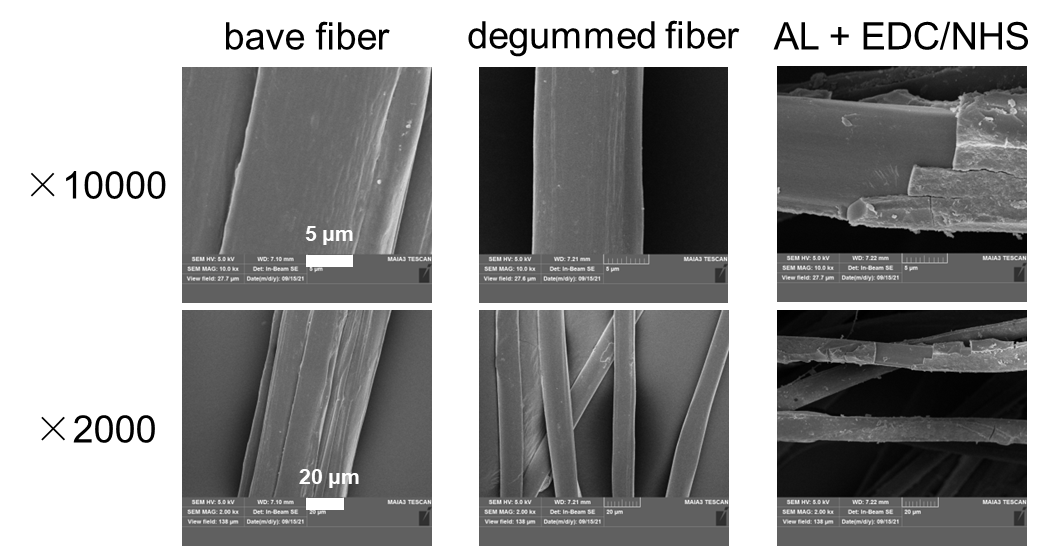


Fig. S16 SEM images of silk samples with scale bars of 20 μm (in the top panel) and 5 μm (in the bottom panel). From left to right: samples of bave fibers (raw silk textile yarns as bought without further purification), degummed fibers, fibers dyed with AL pretreated with EDC/NHS.


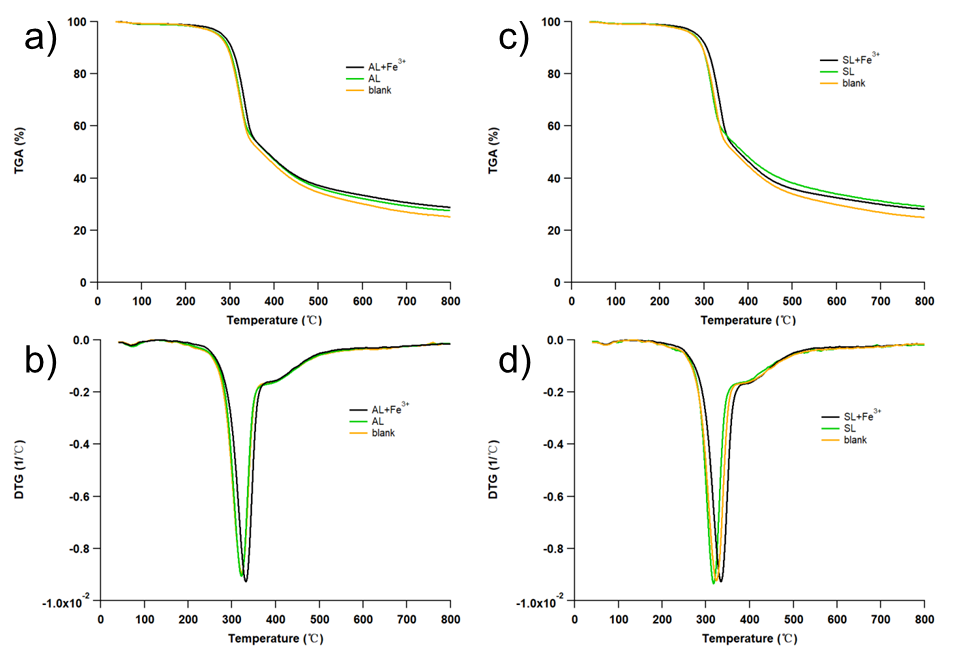


Fig. S17 TGA and DTG analysis of silk fabric samples. The samples were first immersed in NaAc-HAc (200mM, pH=4.5) buffers with either 10 mg·ml-1 AL or 40 mg·ml-1 SL at 60℃ for 2hrs, then in an aqueous solution of 1 mg·ml-1 FeCl3 at room temperature for 2hrs, at a liquor ratio of 1:100.

Table S1. Color fastness of dyed silk fabric samples.

| Samplesa | | | AL+Fe3+ | SL+Fe3+ | commercial  Xiang-Yun-Shab |
| --- | --- | --- | --- | --- | --- |
| color fastness to light | | | 3 | >4 | 3-4 |
| color fastness to rubbing | dry | | 4-5 | 3 | 4 |
| wet | | 4-5 | 3-4 | 2-3 |
| color fastness to washing (soaping) | fading | | 4 | 3-4 | 2-3 |
| staining | cellulose acetate | 4-5 | 4-5 | 4-5 |
| cotton | 4-5 | 4-5 | 4-5 |
| nylon (polyamide) | 4-5 | 4-5 | 4-5 |
| polyester | 4-5 | 4-5 | 4-5 |
| acrylic | 4-5 | 4-5 | 4-5 |
| wool | 4-5 | 4-5 | 4-5 |

a The samples were first immersed in NaAc-HAc (200mM, pH=4.5) buffers with either 10 mg·ml-1 AL or 40 mg·ml-1 SL at 60℃ for 2 hrs, then in an aqueous solution of 1 mg·ml-1 FeCl3 at room temperature for 2 hrs, at a liquor ratio of 1:100.

b Commercially purchased Xiang-Yun-Sha samples were used as the control.
